# Supplementary material for: Ultra-Sensitive Isopropanol Biochemical Gas Sensor (Bio-Sniffer) for Monitoring of Human Volatiles
Source: PubMed Central journal article supplement (PMC7730524; doi:10.3390/s20236827), 2020-11-29
Supplement: sensors-20-06827-s001.pdf [file sensors-20-06827-s001.pdf]

## Supplementary Materials

# Ultra-Sensitive Isopropanol Biochemical Gas Sensor (Bio-Sniffer) for Monitoring of Human Volatiles

Po-Jen Chien <sup>1</sup>, Takuma Suzuki <sup>2</sup>, Ming Ye <sup>3</sup>, Koji Toma <sup>3</sup>, Takahiro Arakawa <sup>3</sup>, Yasuhiko Iwasaki <sup>4</sup> and Kohji Mitsubayashi <sup>2,3,\*</sup>

<sup>1</sup> Institute of Chemistry, Academia Sinica, No. 128, Sec. 2, Academia Rd., Nankang, Taipei 115, Taiwan; wizgx@gate.sinica.edu.tw

<sup>2</sup> Graduate School of Medical and Dental Sciences, Tokyo Medical and Dental University, 1-5-45 Yushima, Bunkyo-Ku, Tokyo 113-8549, Japan; sensinglabo@gmail.com

<sup>3</sup> Department of Biomedical Devices and Instrumentation, Institute of Biomaterials and Bioengineering, Tokyo Medical and Dental University, 2-3-10 Kanda-Surugadai, Chiyoda-ku, Tokyo 101-0062, Japan; ym@fujiclinic.jp (M.Y.); toma.bdi@tmd.ac.jp (K.T.); arakawa.bdi@tmd.ac.jp (T.A.)

<sup>4</sup> Faculty of Chemistry, Materials and Bioengineering, Kansai University, 3-3-35 Yamate-Cho, Suita-Shi, Osaka 564-0836, Japan; yasu.bmt@kansai-u.ac.jp

\* Correspondence: m.bdi@tmd.ac.jp; Tel.: +81-3-5280-8091

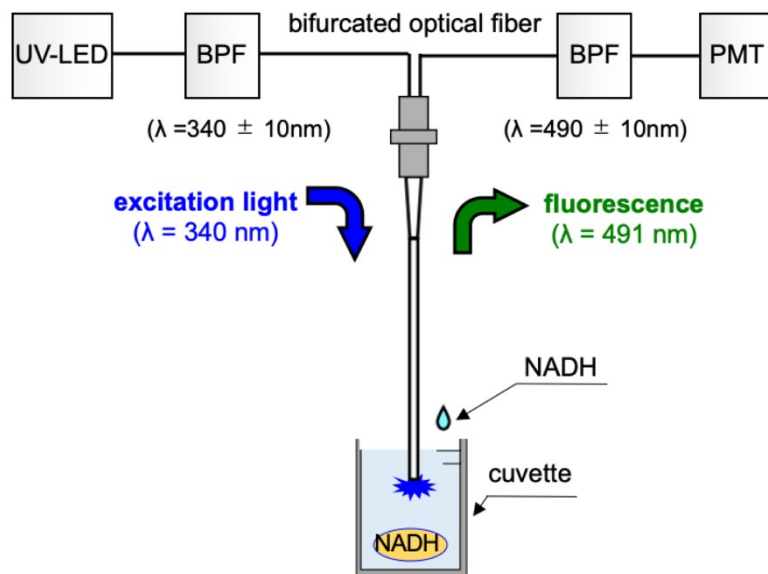

Figure S1. NADH measurement system. The NADH measurement system was composed by an UV-LED, a photomultiplier, an optical fiber probe, and a bifurcated fiber. Two band-pass filters (BPF,  $\lambda=340\pm 10\text{ nm}$  and  $490\pm 10\text{ nm}$ ) were equipped for reducing the interference.

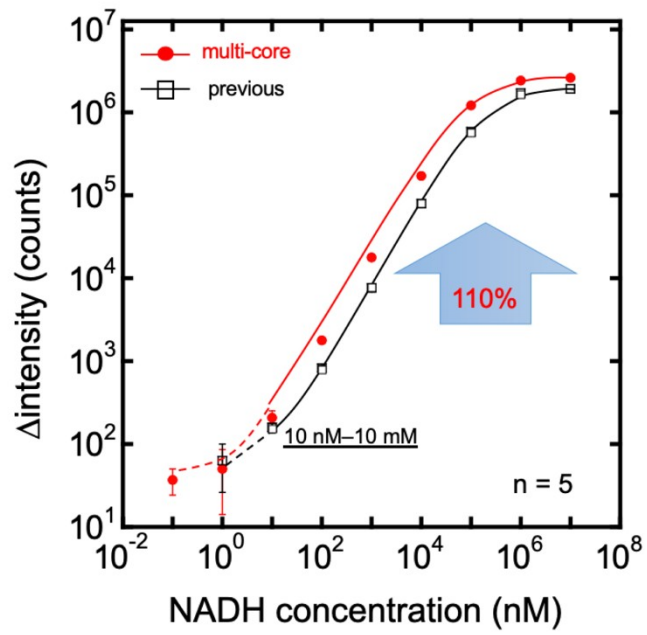

Figure S2. Calibration curves of NADH detection by previous and multi-core type bifurcated fiber probe. The signal intensity measured by the multi-core type showed about more 110% than the previous one. The dynamic range was the same, both were from 10 nM to 10 mM.

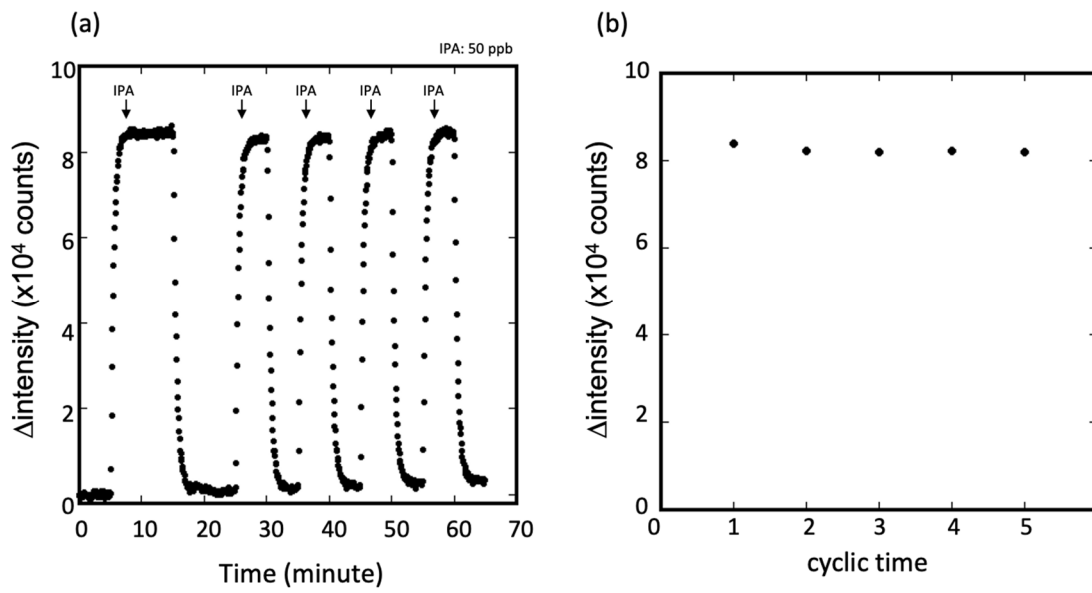

Figure S3. (a) Reproducibility curve of modified bio-sniffer tested by 50 ppb IPA gas. The first cycle measured the IPA gas for 10 minutes, and the second to fourth cycle measured the IPA gas for 5 minutes. (b) The  $\Delta$ intensity of five cyclic measurements. The coefficient of variation was about 0.94%.

### Principle of generating different concentrations of IPA gas

The gas generators we employed (PD-1B-2 and custom-made machine) were the calibration gas generation system. The dilution gas is calculated using the following equation (supply from Gastec, Co., Ltd., Japan):

$$F = (K \times Pr \times L) / C \quad (1)$$

or

$$F = (K \times Dr \times 103) / C \quad (2)$$

Equation (1) is for the permeation tube, and equation (2) uses a diffusion tube. For generating the different concentrations of IPA gas for calibration, we used diffusion tube with Dr 6.68 at 35 °C (PD-1B-2, D-01, C: 270 ppb to 9.06 ppm), diffusion tube with Dr 40.4 at 35 °C (PD-1B-2, D-03, 1.64 ppm to 82.21 ppm), permeation tube with Pr 85.2 at 35 °C (PD-1B-2, C: 7.7 ppb to 346 ppb, F: 200 ml/min to 8 L/min) and permeation tube with Pr 85.2 at 10 °C (custom-made machine, C: 0.5 ppb to 10 ppb, F: 200 ml/min to 5 L/min). The K value of IPA is 0.407. By adjusting the different flow of dilution gas (F), we could produce different IPA gas concentrations.

Abbreviation:

F : Flow of dilution gas (mL/min) (PD-1B-2: 200 ml/min to 8 L/min; custom-made machine: 200 ml/min to 5 L/min)

C : Gas concentration for calibration gas (ppm)

Pr : Permeation rate (ng/min/cm)

L : Effective length of tube (cm)

K : Coefficient for converting the gas weight into volume (L/g)

$K = (22.4/M) \times ((273+t)/273) \times (760/P)$ , (25°C 1atm);

M : Molecular weight; t : Temperature

P : Pressure (mmHg)

Table S1 Specifications of C8855 counting unit, H7421-40 counting head and C9692 PMT

| Parameter                  | Description / Value    |                                                                                                                                |                        |
|----------------------------|------------------------|--------------------------------------------------------------------------------------------------------------------------------|------------------------|
|                            | C8855 counting unit    | H7421-40 counting head                                                                                                         | C9692                  |
| Signal pulse width         | 8 ns or longer         | -                                                                                                                              | 100 ns or more         |
| Max. count rate            | $50 \times 10^6$       | -                                                                                                                              | $3 \times 10^6$        |
| Max. counter capacity      | $2^{32}$ counts / gate | -                                                                                                                              | $2^{32}$ counts / gate |
| Internal counter gate time | 50 $\mu$ s to 10 s     |                                                                                                                                | 1 $\mu$ s to 10 s      |
| Spectral Response range    | -                      | 300 to 720 nm                                                                                                                  | 185 to 650 nm          |
| Count Sensitivity          |                        | 420 nm: $4.7 \times 10^5 \text{ s}^{-1} \cdot \text{pW}^{-1}$<br>550 nm: $7.6 \times 10^5 \text{ s}^{-1} \cdot \text{pW}^{-1}$ | -                      |
| Dark Count                 | -                      | 100                                                                                                                            | 50                     |
| Photocathode size          | -                      | -                                                                                                                              | 16 $\times$ 18 mm      |

This information supply from Hamamatsu Corporation, Japan
